# Supplementary material
Source: publisher figshare collection journal article supplement (https://tandf.figshare.com/ndownloader/files/28718480)
Supplement: Supplementary file 1 [file 28718480]

**SUPPLEMENTARY INFORMATION.**

**Table S1.** Work sheet for histological interpretation of a gill sample. Column, rp: Reaction pattern includes C: Circulatory disturbances (red), RC: Regressive changes (yellow), PC: Progressive changes (green), I: Inflammation (blue) and T: Tumor (purple). The histopathological alterations within each reaction pattern is found in the “Alteration” column.

**Table S2.** Work sheet for histological interpretation of a liver sample. Column, rp: Reaction pattern includes C: Circulatory disturbances (red), RC: Regressive changes (yellow), PC: Progressive changes (green), I: Inflammation (blue) and T: Tumor (purple). The histopathological alterations within each reaction pattern is found in the “Alteration” column.
